# Supplementary material for: Simulated Evolution of Protein-Protein Interaction Networks with Realistic Topology
Source: PubMed Central journal article supplement (PMC3387198; doi:10.1371/journal.pone.0039052), 2012-06-29
Supplement: pone.0039052.s014.pdf [file pone.0039052.s014.pdf]

**Table S1. Scaling exponents.**

|       | $\gamma$ | $\beta$ | $\xi$  | $\alpha$ | $\delta$ |
|-------|----------|---------|--------|----------|----------|
| Yeast | 2.8(2)   | 2.4(1)  | 1.8(2) | 1.2(2)   | 0.32(6)  |
| Fly   | 3.1(2)   | 2.2(4)  | 0.8(5) | 0.8(7)   | 0.0(3)   |
| Human | 2.8(1)   | 2.3(1)  | 1.5(3) | 1.3(2)   | 0.0(1)   |

Distributional exponents ( $p(k) \sim k^{-\gamma}$ ,  $p(b) \sim b^{-\beta}$ ) were estimated using the maximum likelihood method of [90]. Other exponents ( $C \sim k^{-\xi}$ ,  $b \sim k^{\alpha}$ ,  $n \sim k^{-\delta}$ ) were estimated using nonlinear regression. Due to the relatively small sizes of the data sets, there is considerable uncertainty in these estimates.
