# Supplementary material for: Simulated Evolution of Protein-Protein Interaction Networks with Realistic Topology
Source: PubMed Central journal article supplement (PMC3387198; doi:10.1371/journal.pone.0039052), 2012-06-29
Supplement: pone.0039052.s015.pdf [file pone.0039052.s015.pdf]

**Table S2. SMAPE values**

|         | $p(k)$      | $p(\ell)$   | $p(b)$      | $C(k)$      | $n(k)$      | $b(k)$      | $p(\lambda)$ | E.T.        | E.T. ( $k$ ) | $p(n)$      | $\ell(k)$   | Total       |
|---------|-------------|-------------|-------------|-------------|-------------|-------------|--------------|-------------|--------------|-------------|-------------|-------------|
| DUNE    | <b>0.47</b> | <b>0.37</b> | <b>0.36</b> | 0.60        | 0.29        | 0.24        | 0.14         | 0.10        | 0.20         | 0.56        | 0.14        | <b>3.48</b> |
| Vázquez | 0.52        | 0.81        | 0.39        | 0.62        | 0.27        | 0.34        | <b>0.12</b>  | 0.10        | <b>0.15</b>  | <b>0.50</b> | 0.26        | 4.11        |
| Berg    | 0.70        | 0.45        | 0.72        | 0.67        | <b>0.15</b> | <b>0.19</b> | 0.29         | 0.12        | 0.30         | 0.86        | <b>0.06</b> | 4.51        |
| RG      | 0.81        | 0.98        | 0.61        | 0.83        | 0.22        | 0.23        | 0.33         | 0.31        | 0.45         | 0.89        | 0.49        | 6.15        |
| MpK     | 0.82        | 0.79        | 0.68        | 0.89        | 0.88        | 0.58        | 0.18         | 0.18        | 0.18         | 0.82        | 0.16        | 6.18        |
| ER      | 0.83        | 0.70        | 0.78        | <b>0.53</b> | 0.22        | 0.41        | 0.28         | <b>0.07</b> | 0.32         | 0.93        | 0.07        | 5.14        |

Symmetric mean absolute percentage error (SMAPE) of simulation versus experiment in yeast (Eq. 11). ‘E.T.’ is the error tolerance curve with random protein removal, and ‘E.T. ( $k$ )’ is the error tolerance curve with highest-degree proteins removed first. ‘DUNE’ is the model described here, ‘Vázquez’ is the DU-only model of [29], ‘Berg’ is the link dynamics model [84], ‘RG’ is random geometric [88], ‘MpK’ is the physical desolvation model presented in [52], and ‘ER’ is an Erdős-Rényi random graph [89]. For each comparison, the lowest value is shown in bold.
